# Supplementary material for: Polymerase ζ Is Involved in Mitochondrial DNA Maintenance Processes in Concert with APE1 Activity
Source: MDPI journal article supplement (doi:10.3390/genes13050879), 2022-05-13
Supplement: s1 [file s1]

**Supplement:**

**Table S1.** Candidates of the siRNA screening library.

| Gene Name    | GeneID | Protein Name                                                   | Group                                                     |
|--------------|--------|----------------------------------------------------------------|-----------------------------------------------------------|
| AAG/MPG      | 4350   | DNA-3-methyladenine glycosylase                                | Base excision repair (BER)                                |
| APEX2        | 27301  | DNA-(apurinic or apyrimidinic site) endonuclease 2             | Nucleases                                                 |
| APTX         | 54840  | Aprataxin                                                      | Single-strand break repair (SSB-repair)                   |
| BRCA1        | 672    | Breast cancer type 1 susceptibility protein                    | Double-strand break repair (DSB-repair)                   |
| CHIP/STUB1   | 10237  | E3 ubiquitin-protein ligase CHIP                               | ENDOG interacting                                         |
| CSA/ERCC8    | 1161   | DNA excision repair protein ERCC-8                             | Single-strand break repair (SSB-repair)                   |
| CSB/ERCC6    | 2074   | DNA excision repair protein ERCC-6                             | Single-strand break repair (SSB-repair)                   |
| CTIP/RBBP8   | 5932   | DNA endonuclease RBBP8                                         | Nucleases                                                 |
| DNA2         | 1763   | DNA replication ATP-dependent helicase/nuclease DNA2           | Nucleases/Base excision repair (BER)                      |
| ELAC2        | 60528  | Zinc phosphodiesterase ELAC protein 2                          | RNA Processing                                            |
| ENDOG        | 2021   | Endonuclease G, mitochondrial                                  | Nucleases                                                 |
| EXO          | 9941   | Nuclease EXOG, mitochondrial                                   | Nucleases/Base excision repair (BER)                      |
| FEN1         | 2237   | Flap endonuclease 1                                            | Nucleases/Base excision repair (BER)                      |
| GRSF1        | 2926   | G-rich sequence factor 1                                       | RNA Processing                                            |
| HSPA9        | 3313   | Stress-70 protein, mitochondrial                               | ENDOG interacting                                         |
| LIG3         | 3980   | DNA ligase 3                                                   | Base excision repair (BER)/mtDNA Replication              |
| MGME1        | 92667  | Mitochondrial genome maintenance exonuclease 1                 | Nucleases/mtDNA Replication                               |
| MRE11        | 4361   | Double-strand break repair protein MRE11                       | Double-strand break repair (DSB-repair)                   |
| MRPP3/PRORP  | 9692   | Mitochondrial ribonuclease P catalytic subunit                 | RNA Processing                                            |
| MTERF1       | 7978   | Transcription termination factor 1, mitochondrial              | Mitochondrial Transcription                               |
| MUTYH        | 4595   | Adenine DNA glycosylase                                        | Base excision repair (BER)                                |
| NEIL1        | 79661  | Endonuclease 8-like 1                                          | Base excision repair (BER)                                |
| NEIL2        | 252969 | Endonuclease 8-like 2                                          | Base excision repair (BER)                                |
| NTHL1        | 4913   | Endonuclease III-like protein 1                                | Base excision repair (BER)                                |
| OGG1         | 4968   | N-glycosylase/DNA lyase                                        | Base excision repair (BER)                                |
| PARP1        | 142    | Poly [ADP-ribose] polymerase 1                                 | Single-strand break repair (SSB-repair)                   |
| PNKP         | 11284  | Bifunctional polynucleotide phosphatase/kinase                 | Base excision repair (BER)                                |
| PNPASE/PNPT1 | 87178  | Polyribonucleotide nucleotidyltransferase 1, mitochondrial     | RNA Processing                                            |
| POLB         | 5423   | DNA polymerase beta                                            | Polymerases/Base excision repair (BER)                    |
| POLGB/POLG2  | 11232  | DNA polymerase subunit gamma-2, mitochondrial                  | Polymerases/mtDNA Replication/ Base excision repair (BER) |
| POLGA/POLG1  | 5428   | DNA polymerase subunit gamma-1                                 | Polymerases/mtDNA Replication/Base excision repair (BER)  |
| POLQ         | 10721  | DNA polymerase theta                                           | Polymerases                                               |
| POLRMT       | 5442   | DNA-directed RNA polymerase, mitochondrial                     | Polymerases/mtDNA Replication & Transcription             |
| POLZ/REV3L   | 5980   | DNA polymerase zeta catalytic subunit                          | Polymerases                                               |
| PRIMPOL      | 201973 | DNA-directed primase/polymerase protein                        | Polymerases                                               |
| PTCD2        | 79810  | Pentatricopeptide repeat-containing protein 2, mitochondrial   | RNA Processing                                            |
| RAD51        | 5888   | DNA repair protein RAD51 homolog 1                             | Double-strand break repair (DSB-repair)                   |
| RAD51C       | 5889   | DNA repair protein RAD51 homolog 3                             | Double-strand break repair (DSB-repair)                   |
| REXO2        | 25996  | Oligoribonuclease, mitochondrial                               | RNA Processing                                            |
| RMRP         | 6023   | RNA component of mitochondrial RNA processing endoribonuclease | RNA Processing                                            |
| RNASEH1      | 246243 | Ribonuclease H1                                                | Mitochondrial Replication/RNA Processing                  |

|              |       |                                                            |                                         |
|--------------|-------|------------------------------------------------------------|-----------------------------------------|
| SSBP1        | 6742  | Single-stranded DNA-binding protein, mitochondria (mt-SSB) | Mitochondrial Replication               |
| SUV3/SUPV3L1 | 6832  | ATP-dependent RNA helicase SUPV3L1, mitochondrial          | RNA Processing                          |
| TDP1         | 55775 | Tyrosyl-DNA phosphodiesterase 1                            | Single-strand break repair (SSB-repair) |
| TEFM         | 79736 | Transcription elongation factor, mitochondrial             | Mitochondrial Transcription             |
| TET2         | 54790 | Methylcytosine dioxygenase TET2                            | ENDOG interacting                       |
| TFAM         | 7019  | Transcription factor A, mitochondrial                      | Mitochondrial Transcription             |
| TFB2M        | 64216 | Dimethyladenosine transferase 2, mitochondrial             | Mitochondrial Transcription             |
| TOP3A        | 7156  | DNA topoisomerase 3-alpha                                  | Mitochondrial Replication               |
| TP53         | 7157  | Cellular tumor antigen p53                                 | Single-strand break repair (SSB-repair) |
| TRAP1        | 10131 | Heat shock protein 75 kDa, mitochondrial                   | ENDOG interacting                       |
| TWNK         | 56652 | Twinkle protein, mitochondrial                             | Mitochondrial Replication               |
| UNG          | 7374  | Uracil-DNA glycosylase                                     | Base excision repair (BER)              |
| XRCC3        | 7517  | DNA repair protein XRCC3                                   | Double-strand break repair (DSB-repair) |
| XRCC5/ KU80  | 7520  | X-ray repair cross-complementing protein 5                 | Double-strand break repair (DSB-repair) |
| XRCC6/ KU70  | 2547  | X-ray repair cross-complementing protein 6                 | Double-strand break repair (DSB-repair) |
| YB1/ YBX1    | 4904  | Y-box-binding protein 1                                    | mismatch repair (MMR)                   |

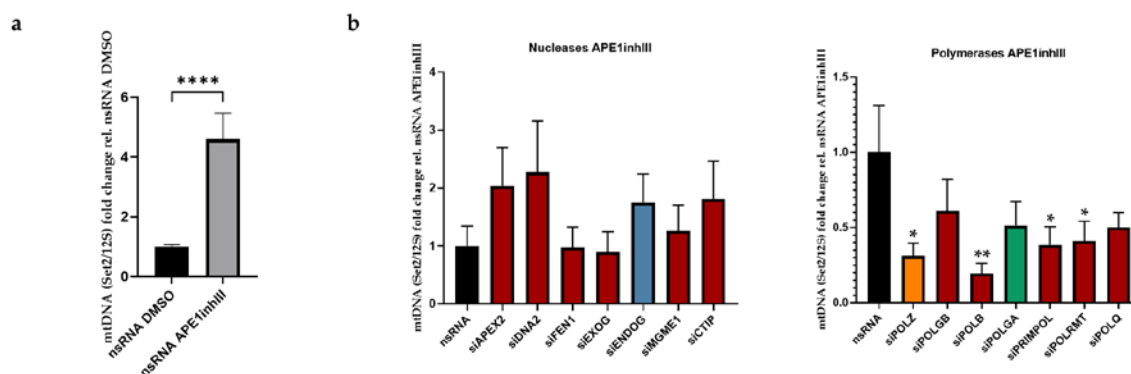

**Figure S1.** Impact of APE1inhIII on mtDNA maintenance: nsRNA transfected control cells were treated with DMSO or 15  $\mu$ M APE1inhIII for 5 h after 48 h cultivation in galactose medium (a) PCR products of the 7 kb long mtDNA Set2 region amplified from total DNA were quantified, normalized to the sample-specific values for the 0.2 kb short mitochondrial 12S region and plotted relative (rel.) to the mean values for nsRNA transfected samples per experiment ( $n = 56$  from 28 independent experiments). (b) HeLa cells were grown in galactose medium and subjected to siRNA-mediated knockdown of indicated candidate proteins associated with mitochondrial functions for 48 h and treated with 15  $\mu$ M APE1inhIII for 5 h. Set2/12S mtDNA was plotted relative to nsRNA ( $n = 8$  from 4 independent experiments). All values are means  $\pm$  SEM (\*  $p \leq 0.05$ , \*\*  $p \leq 0.01$  and \*\*\*\*  $p \leq 0.0001$ ).

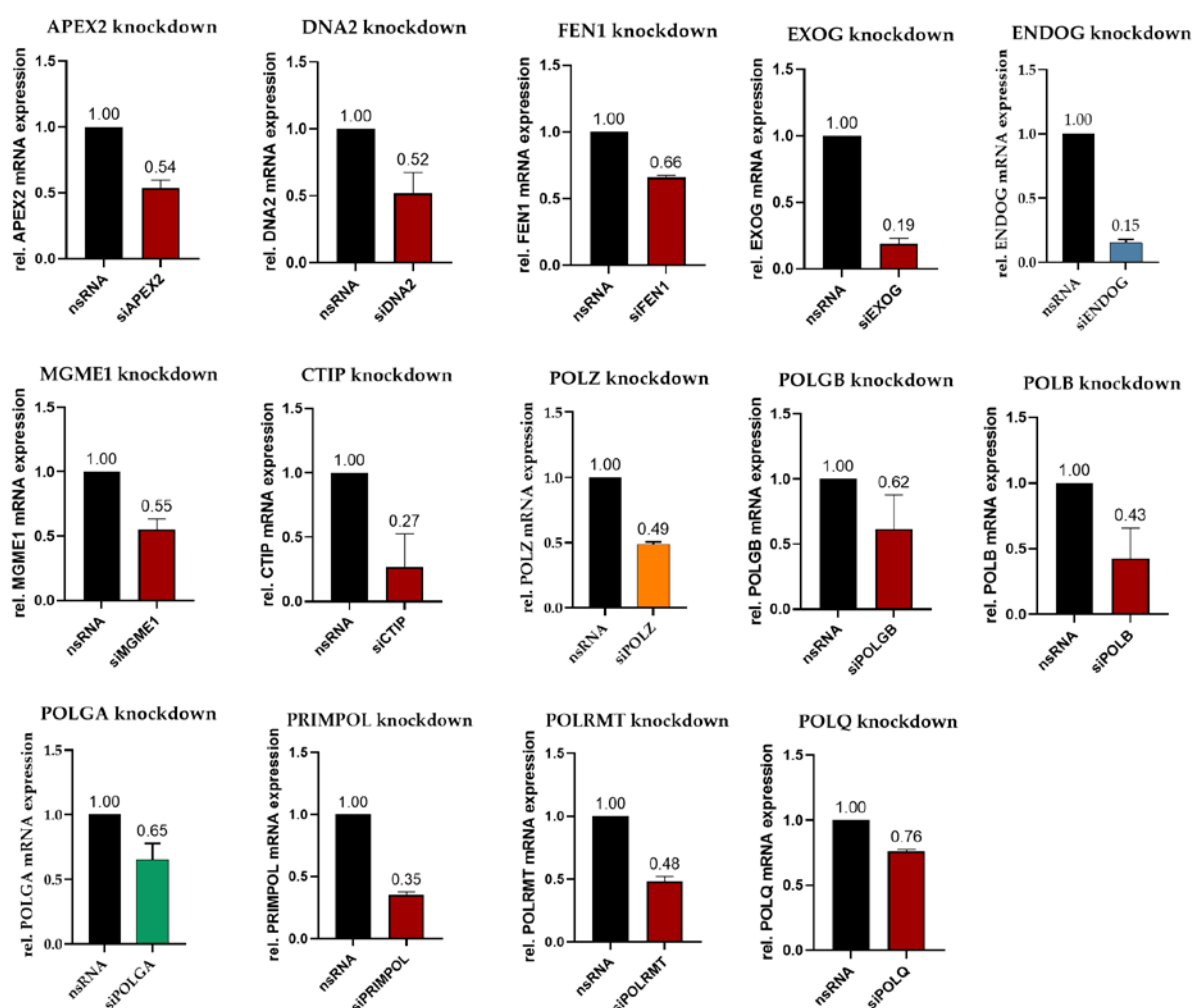

**Figure S2.** Knockdown efficiency: qPCR-based quantification of the gene expression of the group of nucleases and polymerases in Figure 3b after transfection with 1nM nsRNA or 1nM specific siRNA. All values are means  $\pm$  SD of  $n = 4$  experiments from 2 independent mRNA isolations.

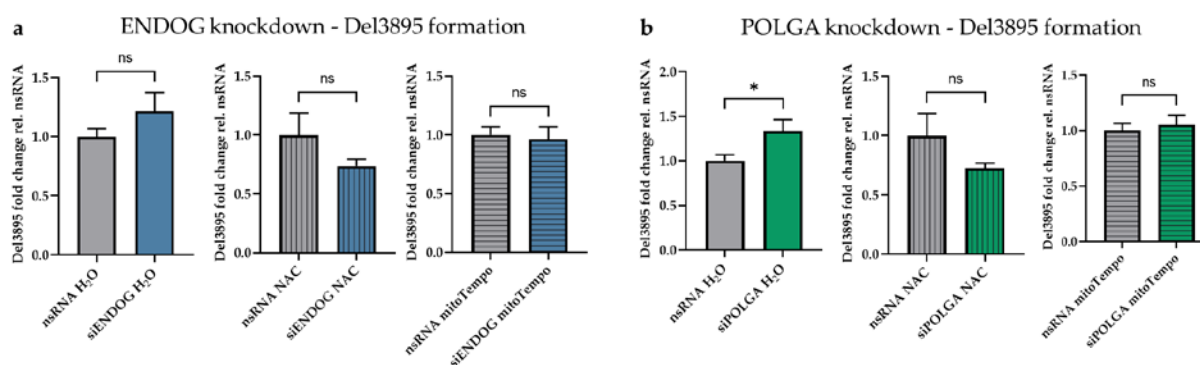

**Figure S3.** Del3895 formation after ENDOG or POLGA knockdown: Quantification of Del3895 deletion product from HeLa cells cultured in galactose medium, siRNA-mediated knockdown for 48 h of ENDOG (a) or POLGA (b) plus 24 h treatment with 100  $\mu$ M mitoTempo or 2 mM NAC as outlined in Figure 4a ( $n = 10$  from 5 independent experiments). All values are means  $\pm$  SEM (\*  $p \leq 0.05$ ).

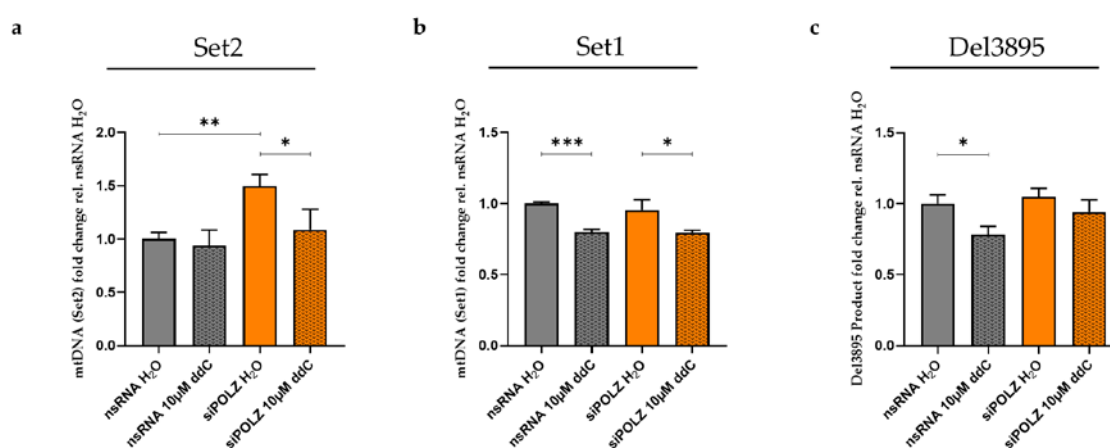

**Figure S4.** Effect of mtDNA replication inhibition. HeLa cells were cultured in galactose medium and POLZ knockdown was performed for 48 h. Total DNA was isolated after treatment with H<sub>2</sub>O or 10 µM ddC for 24 h. Quantified Set2 PCR products (a), Set1 PCR products (b) and Del3895 product formation (c) were plotted relative to nsRNA H<sub>2</sub>O control values for cells transfected with nsRNA (grey bars) or siPOLZ (orange bars). All values are means ± SEM (n = 7–8 of 4 independent experiments) (\* p ≤ 0.05, \*\* p ≤ 0.01 and \*\*\* p ≤ 0.001).

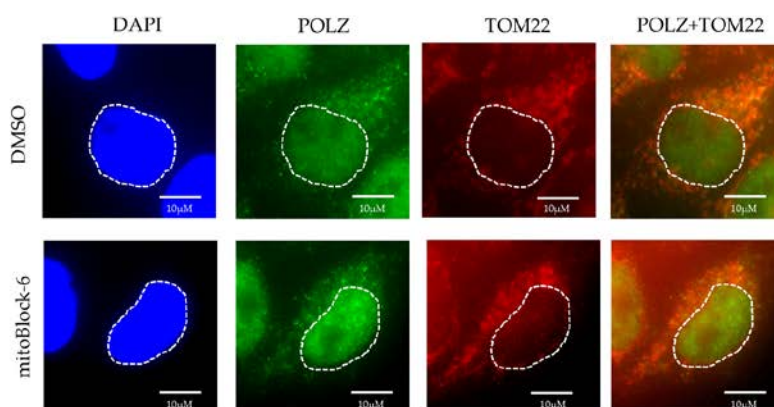

**Figure S5.** POLZ localizes to mitochondria. Representative images of POLZ fluorescence intensity in HeLa cells treated for 48 h with DMSO or 10 µM mitoBlock-6 showing colocalization with mitochondrial marker TOM22. scale bar = 10µM.

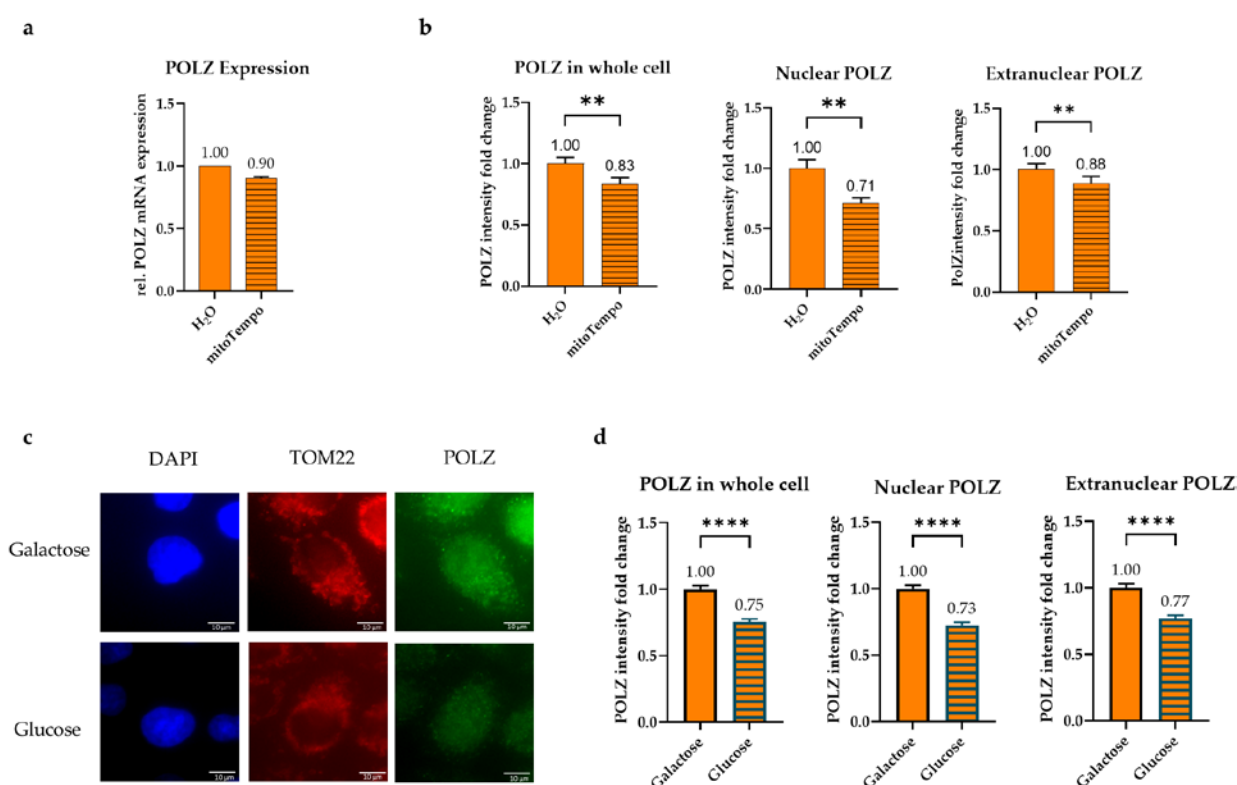

**Figure S6.** POLZ level depends on ROS: Quantification of POLZ expression by qRT-PCR in HeLa cells cultured in galactose medium and treated with H<sub>2</sub>O or 100  $\mu$ M mitoTempo for 24 h (a). Fluorescence-based quantification of POLZ signal intensities in the whole cell, nucleus or extranuclear regions, n = 74–79 from 2 independent experiments (b). Representative microscopic images of HeLa cells cultured 72 h in either galactose or glucose media stained for mitochondrial TOM22 and POLZ (c) and the quantification of POLZ signal in the whole cell, nucleus and extranuclear regions, n = 169–174 cells from 3 independent experiments (d). All values are means  $\pm$  SEM, (\*\* p  $\leq$  0.01, \*\*\*\* p  $\leq$  0.0001), scale bar = 10  $\mu$ M.

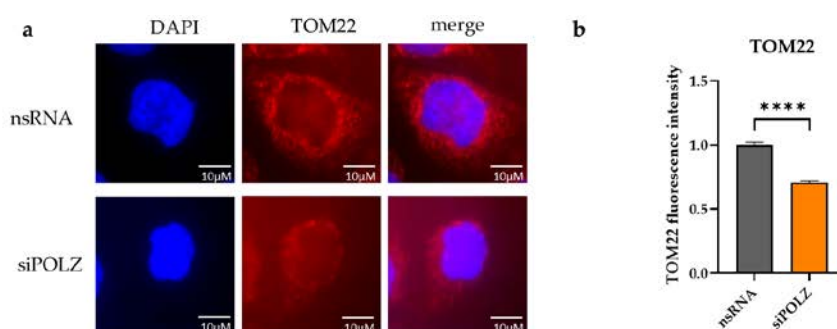

**Figure S7.** POLZ depletion reduces mitochondrial mass: Representative immunofluorescence images of TOM22 intensity in HeLa cells transfected with nsRNA or siPOLZ for 48 h (a) scale bar = 10  $\mu$ M and their quantification (b). All values are  $\pm$  SEM from two independent experiments n = 189–204 cells (\*\*\*\* p  $\leq$  0.0001).
